# Supplementary material
Source: PubMed Central journal article supplement (PMC2258556)

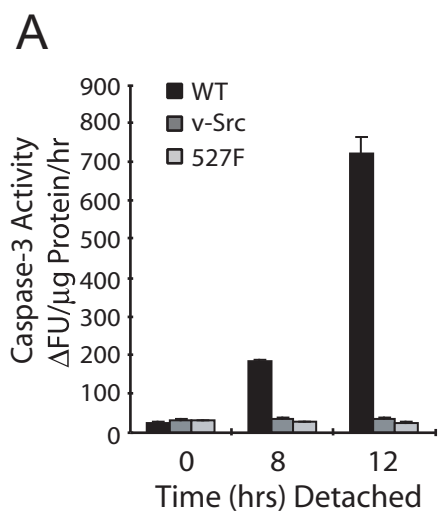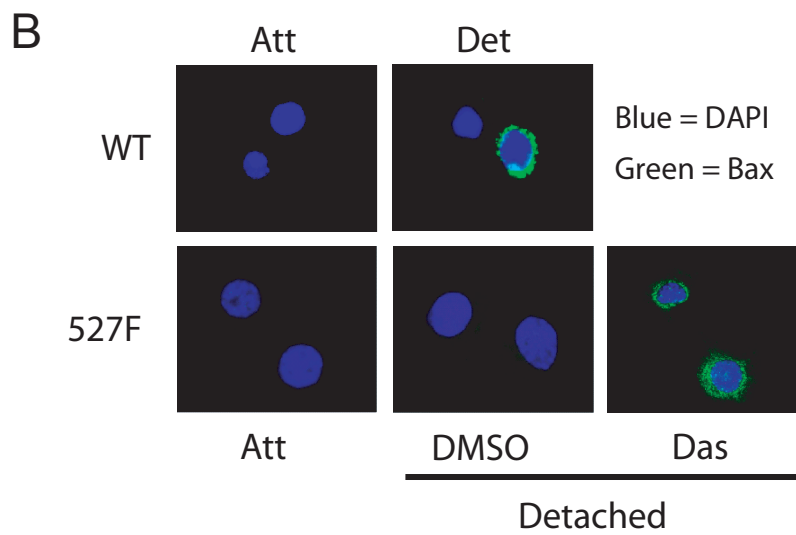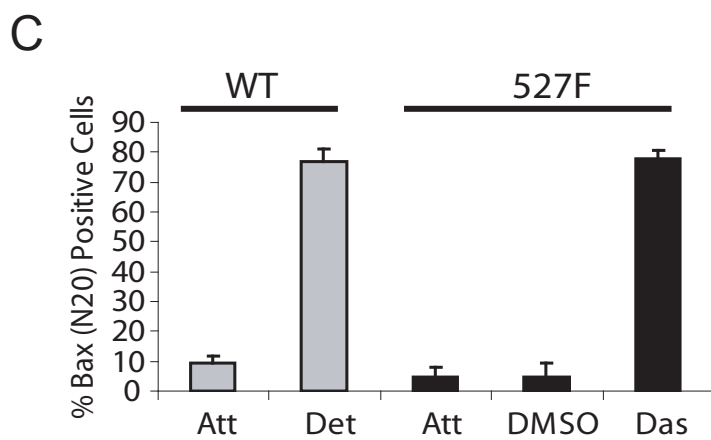

Supplement: NIHMS40980-supplement-Figure_S1.pdf [file NIHMS40980-supplement-Figure_S1.pdf]

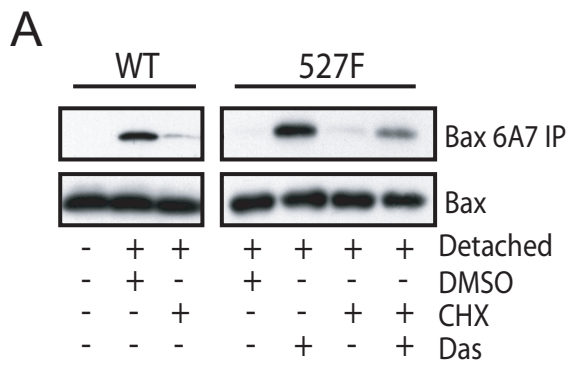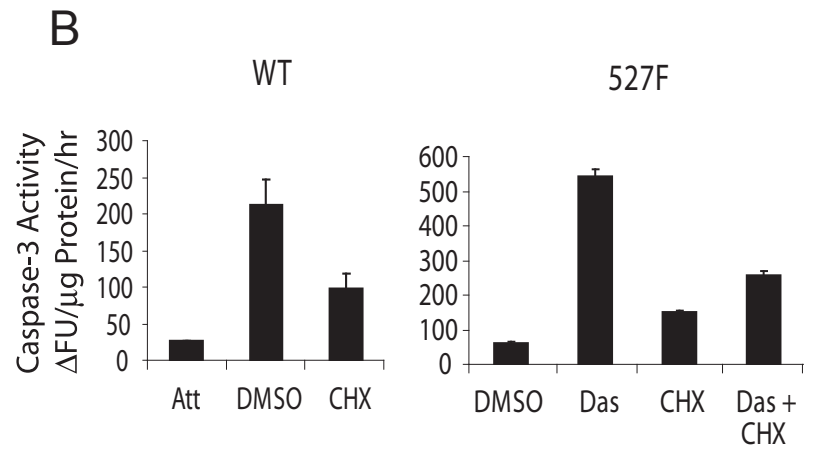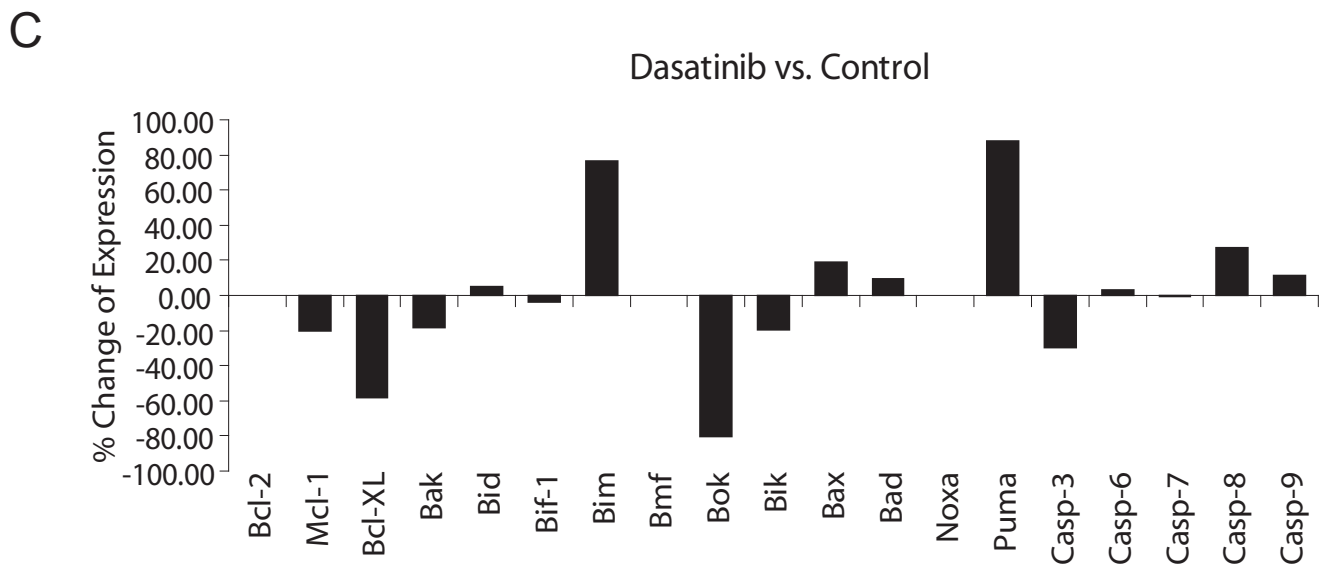

Supplement: NIHMS40980-supplement-Figure_S2.pdf [file NIHMS40980-supplement-Figure_S2.pdf]

**A**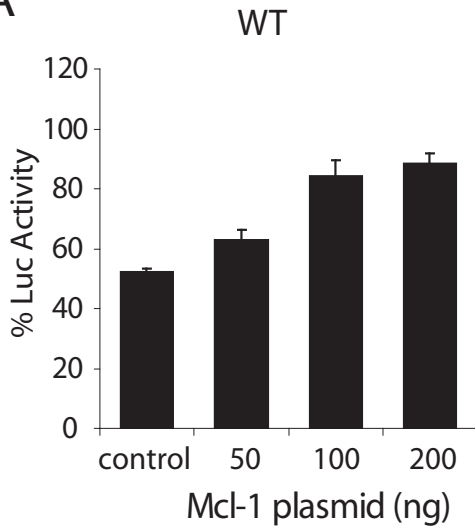**B**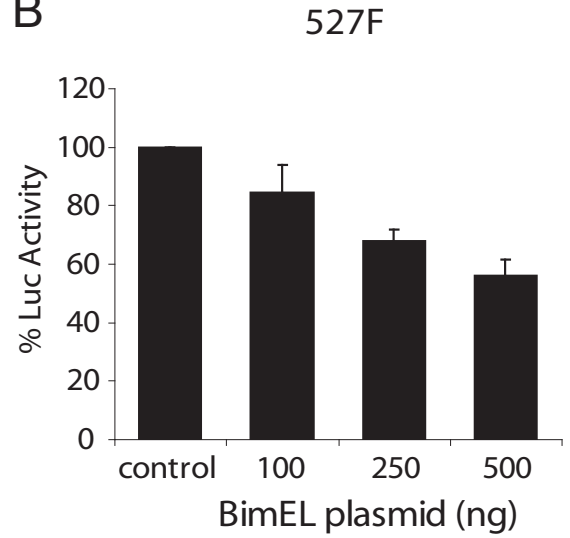**C**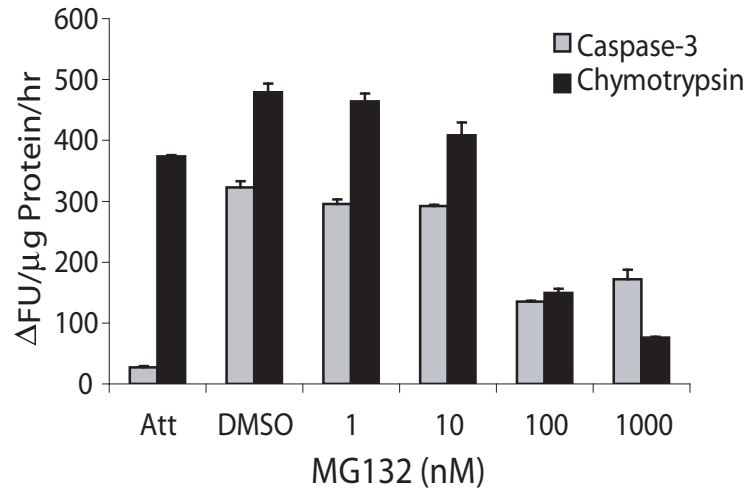**D**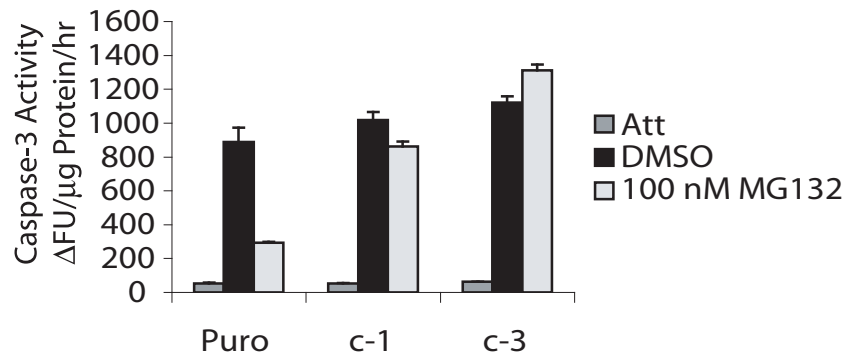

Supplement: NIHMS40980-supplement-Figure_S3.pdf [file NIHMS40980-supplement-Figure_S3.pdf]

**A**

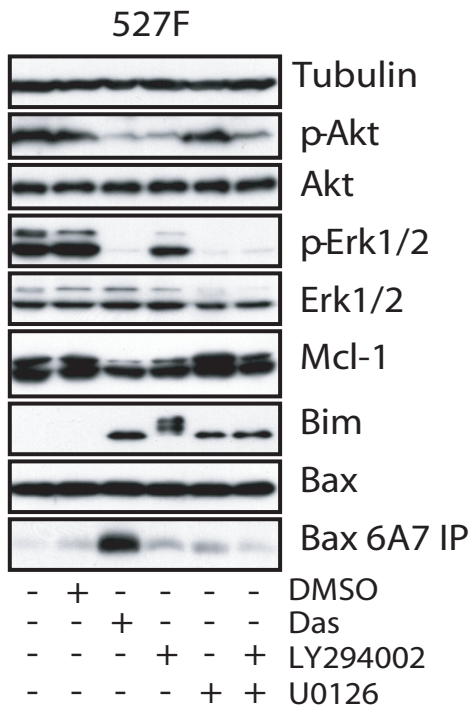

**B**

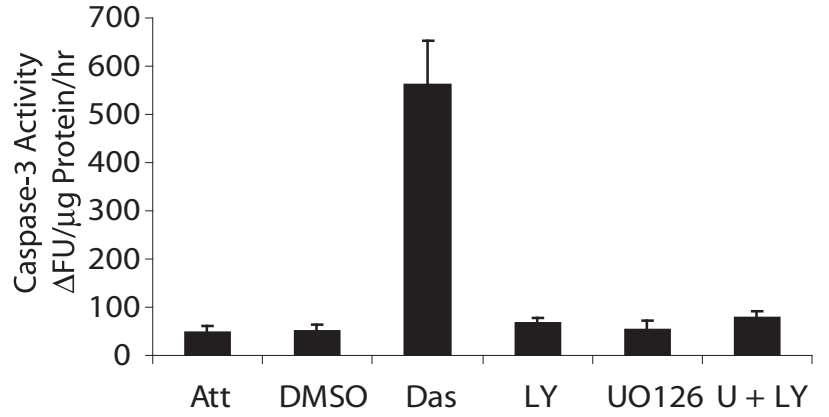

**C**

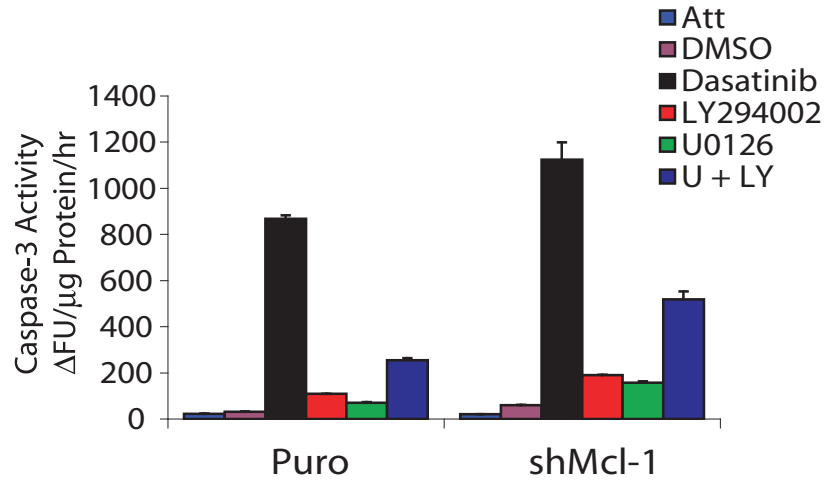

**D**

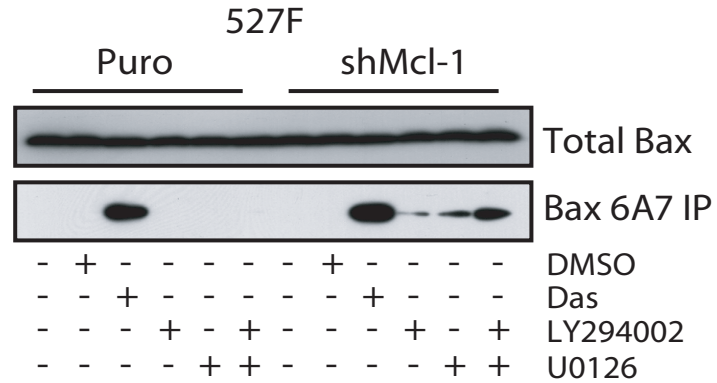

Supplement: NIHMS40980-supplement-Figure_S4.pdf [file NIHMS40980-supplement-Figure_S4.pdf]
